# Supplementary material
Source: MDPI journal article supplement (https://www.mdpi.com/2073-4352/11/4/325)

# checkCIF/PLATON report

Structure factors have been supplied for datablock(s) mag173\_150k

THIS REPORT IS FOR GUIDANCE ONLY. IF USED AS PART OF A REVIEW PROCEDURE FOR PUBLICATION, IT SHOULD NOT REPLACE THE EXPERTISE OF AN EXPERIENCED CRYSTALLOGRAPHIC REFEREE.

No syntax errors found.      CIF dictionary      Interpreting this report

## Datablock: mag173\_150k

---

Bond precision:    C-C = 0.0058 A                      Wavelength=1.34143

Cell:              a=9.9626(4)              b=10.2503(4)              c=17.6464(7)  
                    alpha=82.754(3)              beta=77.201(3)              gamma=67.946(3)

Temperature:    150 K

|                | Calculated     | Reported       |
|----------------|----------------|----------------|
| Volume         | 1626.85(12)    | 1626.85(12)    |
| Space group    | P -1           | P -1           |
| Hall group     | -P 1           | -P 1           |
| Moiety formula | C24 H24 Br2 O2 | C24 H24 Br2 O2 |
| Sum formula    | C24 H24 Br2 O2 | C24 H24 Br2 O2 |
| Mr             | 504.23         | 504.25         |
| Dx,g cm-3      | 1.544          | 1.544          |
| Z              | 3              | 3              |
| Mu (mm-1)      | 3.218          | 3.218          |
| F000           | 762.0          | 762.0          |
| F000'          | 757.54         |                |
| h,k,lmax       | 12,12,21       | 12,12,21       |
| Nref           | 6585           | 6466           |
| Tmin,Tmax      | 0.714,0.851    | 0.005,0.133    |
| Tmin'          | 0.588          |                |

Correction method= # Reported T Limits: Tmin=0.005 Tmax=0.133  
AbsCorr = MULTI-SCAN

Data completeness= 0.982                      Theta(max)= 56.692

R(reflections)= 0.0564( 6040)              wR2(reflections)= 0.1554( 6466)

S = 1.035                      Npar= 397

---

The following ALERTS were generated. Each ALERT has the format  
**test-name\_ALERT\_alert-type\_alert-level.**  
Click on the hyperlinks for more details of the test.

---

### ● Alert level C

|                   |                                                |           |   |                                 |       |        |
|-------------------|------------------------------------------------|-----------|---|---------------------------------|-------|--------|
| PLAT220_ALERT_2_C | NonSolvent                                     | Resd 1    | C | Ueq(max)/Ueq(min) Range         | 3.4   | Ratio  |
| PLAT241_ALERT_2_C | High                                           | 'MainMol' |   | Ueq as Compared to Neighbors of | C14   | Check  |
| PLAT241_ALERT_2_C | High                                           | 'MainMol' |   | Ueq as Compared to Neighbors of | C16   | Check  |
| PLAT250_ALERT_2_C | Large U3/U1 Ratio for Average U(i,j) Tensor    | ....      |   |                                 | 2.1   | Note   |
| PLAT911_ALERT_3_C | Missing FCF Refl Between Thmin & STh/L=        | 0.600     |   |                                 | 20    | Report |
| PLAT918_ALERT_3_C | Reflection(s) with I(obs) much Smaller I(calc) | .         |   |                                 | 4     | Check  |
| PLAT977_ALERT_2_C | Check Negative Difference Density on H22       |           |   |                                 | -0.31 | eA-3   |

---

### ● Alert level G

|                   |                                                  |                |  |  |       |        |
|-------------------|--------------------------------------------------|----------------|--|--|-------|--------|
| ABSMU01_ALERT_1_G | Calculation of _exptl_absorpt_correction_mu      |                |  |  |       |        |
|                   | not performed for this radiation type.           |                |  |  |       |        |
| PLAT002_ALERT_2_G | Number of Distance or Angle Restraints on AtSite |                |  |  | 4     | Note   |
| PLAT072_ALERT_2_G | SHELXL First Parameter in WGHT Unusually Large   |                |  |  | 0.11  | Report |
| PLAT154_ALERT_1_G | The s.u.'s on the Cell Angles are Equal ..(Note) |                |  |  | 0.003 | Degree |
| PLAT171_ALERT_4_G | The CIF-Embedded .res File Contains EADP Records |                |  |  | 1     | Report |
| PLAT172_ALERT_4_G | The CIF-Embedded .res File Contains DFIX Records |                |  |  | 3     | Report |
| PLAT300_ALERT_4_G | Atom Site Occupancy of C17                       | Constrained at |  |  | 0.5   | Check  |
| PLAT300_ALERT_4_G | Atom Site Occupancy of C18                       | Constrained at |  |  | 0.5   | Check  |
| PLAT300_ALERT_4_G | Atom Site Occupancy of C19                       | Constrained at |  |  | 0.5   | Check  |
| PLAT300_ALERT_4_G | Atom Site Occupancy of C20                       | Constrained at |  |  | 0.5   | Check  |
| PLAT300_ALERT_4_G | Atom Site Occupancy of C21                       | Constrained at |  |  | 0.5   | Check  |
| PLAT300_ALERT_4_G | Atom Site Occupancy of C22                       | Constrained at |  |  | 0.5   | Check  |
| PLAT300_ALERT_4_G | Atom Site Occupancy of C23                       | Constrained at |  |  | 0.5   | Check  |
| PLAT300_ALERT_4_G | Atom Site Occupancy of C24                       | Constrained at |  |  | 0.5   | Check  |
| PLAT300_ALERT_4_G | Atom Site Occupancy of C25                       | Constrained at |  |  | 0.5   | Check  |
| PLAT300_ALERT_4_G | Atom Site Occupancy of C26                       | Constrained at |  |  | 0.5   | Check  |
| PLAT300_ALERT_4_G | Atom Site Occupancy of C27                       | Constrained at |  |  | 0.5   | Check  |
| PLAT300_ALERT_4_G | Atom Site Occupancy of C28                       | Constrained at |  |  | 0.5   | Check  |
| PLAT300_ALERT_4_G | Atom Site Occupancy of C29                       | Constrained at |  |  | 0.5   | Check  |
| PLAT300_ALERT_4_G | Atom Site Occupancy of C30                       | Constrained at |  |  | 0.5   | Check  |
| PLAT300_ALERT_4_G | Atom Site Occupancy of C31                       | Constrained at |  |  | 0.5   | Check  |
| PLAT300_ALERT_4_G | Atom Site Occupancy of C44                       | Constrained at |  |  | 0.5   | Check  |
| PLAT300_ALERT_4_G | Atom Site Occupancy of H16A                      | Constrained at |  |  | 0.5   | Check  |
| PLAT300_ALERT_4_G | Atom Site Occupancy of H16B                      | Constrained at |  |  | 0.5   | Check  |
| PLAT300_ALERT_4_G | Atom Site Occupancy of H16C                      | Constrained at |  |  | 0.5   | Check  |
| PLAT300_ALERT_4_G | Atom Site Occupancy of H16D                      | Constrained at |  |  | 0.5   | Check  |
| PLAT300_ALERT_4_G | Atom Site Occupancy of H17A                      | Constrained at |  |  | 0.5   | Check  |
| PLAT300_ALERT_4_G | Atom Site Occupancy of H17B                      | Constrained at |  |  | 0.5   | Check  |
| PLAT300_ALERT_4_G | Atom Site Occupancy of H18A                      | Constrained at |  |  | 0.5   | Check  |
| PLAT300_ALERT_4_G | Atom Site Occupancy of H18B                      | Constrained at |  |  | 0.5   | Check  |
| PLAT300_ALERT_4_G | Atom Site Occupancy of H20                       | Constrained at |  |  | 0.5   | Check  |
| PLAT300_ALERT_4_G | Atom Site Occupancy of H21                       | Constrained at |  |  | 0.5   | Check  |
| PLAT300_ALERT_4_G | Atom Site Occupancy of H22                       | Constrained at |  |  | 0.5   | Check  |
| PLAT300_ALERT_4_G | Atom Site Occupancy of H23                       | Constrained at |  |  | 0.5   | Check  |
| PLAT300_ALERT_4_G | Atom Site Occupancy of H24                       | Constrained at |  |  | 0.5   | Check  |
| PLAT300_ALERT_4_G | Atom Site Occupancy of H25A                      | Constrained at |  |  | 0.5   | Check  |
| PLAT300_ALERT_4_G | Atom Site Occupancy of H25B                      | Constrained at |  |  | 0.5   | Check  |
| PLAT300_ALERT_4_G | Atom Site Occupancy of H27                       | Constrained at |  |  | 0.5   | Check  |
| PLAT300_ALERT_4_G | Atom Site Occupancy of H28                       | Constrained at |  |  | 0.5   | Check  |
| PLAT300_ALERT_4_G | Atom Site Occupancy of H29                       | Constrained at |  |  | 0.5   | Check  |
| PLAT300_ALERT_4_G | Atom Site Occupancy of H30                       | Constrained at |  |  | 0.5   | Check  |
| PLAT300_ALERT_4_G | Atom Site Occupancy of H31                       | Constrained at |  |  | 0.5   | Check  |
| PLAT300_ALERT_4_G | Atom Site Occupancy of H44A                      | Constrained at |  |  | 0.5   | Check  |
| PLAT300_ALERT_4_G | Atom Site Occupancy of H44B                      | Constrained at |  |  | 0.5   | Check  |
| PLAT301_ALERT_3_G | Main Residue Disorder .....(Resd 1 )             |                |  |  | 29%   | Note   |
| PLAT411_ALERT_2_G | Short Inter H...H Contact H13 ..H28              | .              |  |  | 2.11  | Ang.   |
|                   | -1+x,-1+y,1+z =                                  |                |  |  | 1_446 | Check  |
| PLAT434_ALERT_2_G | Short Inter HL..HL Contact Br1 ..Br1             |                |  |  | 3.46  | Ang.   |
|                   | -x,-y,1-z =                                      |                |  |  | 2_556 | Check  |

|                   |                                                  |     |             |
|-------------------|--------------------------------------------------|-----|-------------|
| PLAT860_ALERT_3_G | Number of Least-Squares Restraints .....         | 3   | Note        |
| PLAT883_ALERT_1_G | No Info/Value for _atom_sites_solution_primary . |     | Please Do ! |
| PLAT912_ALERT_4_G | Missing # of FCF Reflections Above STh/L= 0.600  | 99  | Note        |
| PLAT933_ALERT_2_G | Number of OMIT Records in Embedded .res File ... | 1   | Note        |
| PLAT941_ALERT_3_G | Average HKL Measurement Multiplicity .....       | 2.9 | Low         |
| PLAT978_ALERT_2_G | Number C-C Bonds with Positive Residual Density. | 3   | Info        |

---

0 **ALERT level A** = Most likely a serious problem - resolve or explain  
 0 **ALERT level B** = A potentially serious problem, consider carefully  
 7 **ALERT level C** = Check. Ensure it is not caused by an omission or oversight  
 53 **ALERT level G** = General information/check it is not something unexpected

3 ALERT type 1 CIF construction/syntax error, inconsistent or missing data  
 11 ALERT type 2 Indicator that the structure model may be wrong or deficient  
 5 ALERT type 3 Indicator that the structure quality may be low  
 41 ALERT type 4 Improvement, methodology, query or suggestion  
 0 ALERT type 5 Informative message, check

---

It is advisable to attempt to resolve as many as possible of the alerts in all categories. Often the minor alerts point to easily fixed oversights, errors and omissions in your CIF or refinement strategy, so attention to these fine details can be worthwhile. In order to resolve some of the more serious problems it may be necessary to carry out additional measurements or structure refinements. However, the purpose of your study may justify the reported deviations and the more serious of these should normally be commented upon in the discussion or experimental section of a paper or in the "special\_details" fields of the CIF. checkCIF was carefully designed to identify outliers and unusual parameters, but every test has its limitations and alerts that are not important in a particular case may appear. Conversely, the absence of alerts does not guarantee there are no aspects of the results needing attention. It is up to the individual to critically assess their own results and, if necessary, seek expert advice.

### Publication of your CIF in IUCr journals

A basic structural check has been run on your CIF. These basic checks will be run on all CIFs submitted for publication in IUCr journals (*Acta Crystallographica*, *Journal of Applied Crystallography*, *Journal of Synchrotron Radiation*); however, if you intend to submit to *Acta Crystallographica Section C* or *E* or *IUCrData*, you should make sure that full publication checks are run on the final version of your CIF prior to submission.

### Publication of your CIF in other journals

Please refer to the *Notes for Authors* of the relevant journal for any special instructions relating to CIF submission.

---

**PLATON version of 05/12/2020; check.def file version of 05/12/2020**

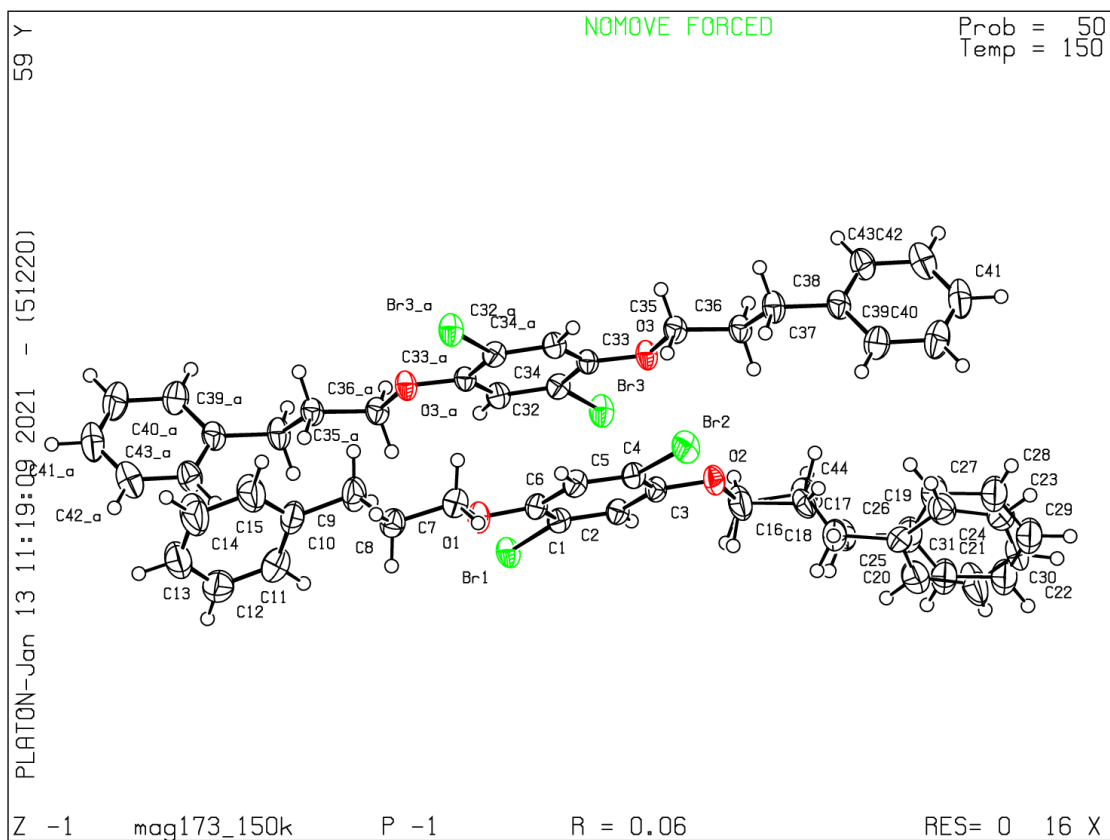

Supplement: s1 [file s1]
